# Supplementary material for: NMR Chemical Shift Ranges of Urine Metabolites in Various Organic Solvents
Source: PubMed Central journal article supplement (PMC5041126; doi:10.3390/metabo6030027), 2016-09-02
Supplement: metabolites-06-00027-s001.pdf [file metabolites-06-00027-s001.pdf]

# Supplementary Materials: NMR Chemical Shift Ranges of Urine Metabolites in Various Organic Solvents

Benjamin Göring, Stefan Bräse and Burkhard Luy

## Tabular Representation of Integrals

Integral values were calculated for the five selected metabolites for all five spectra per solvent by summing up all points in the region. Regions were defined individually for every solvent. Mean values and standard deviations are given in Table S1–S5.

**Table S1.** Mean value and standard deviation of the creatinine signal at 3 ppm.

| Solvent      | Mean               | Standard Deviation | Deviation in % |
|--------------|--------------------|--------------------|----------------|
| Water        | $2.49 \times 10^8$ | $2.85 \times 10^6$ | 1.15%          |
| Methanol     | $3.23 \times 10^8$ | $1.06 \times 10^7$ | 3.29%          |
| Acetonitrile | $3.79 \times 10^7$ | $4.24 \times 10^6$ | 11.16%         |
| DMSO         | $2.73 \times 10^8$ | $4.37 \times 10^6$ | 1.60%          |
| Acetone      | $2.83 \times 10^7$ | $7.91 \times 10^6$ | 27.97%         |
| DMF          | $3.96 \times 10^8$ | $1.85 \times 10^7$ | 4.66%          |

**Table S2.** Mean value and standard deviation of the hippurate signal at 7.5 ppm.

| Solvent         | Mean               | Standard Deviation | Deviation in % |
|-----------------|--------------------|--------------------|----------------|
| Water           | $3.70 \times 10^7$ | $3.17 \times 10^5$ | 0.86%          |
| Methanol        | $4.82 \times 10^7$ | $1.33 \times 10^6$ | 2.76%          |
| Acetonitrile    | $8.15 \times 10^6$ | $5.64 \times 10^5$ | 6.92%          |
| DMSO            | $4.36 \times 10^7$ | $4.81 \times 10^5$ | 1.10%          |
| Chloroform      | $4.90 \times 10^6$ | $1.56 \times 10^6$ | 31.83%         |
| Acetone         | $1.17 \times 10^7$ | $3.14 \times 10^6$ | 26.84%         |
| Dichloromethane | $2.82 \times 10^6$ | $4.42 \times 10^5$ | 15.65%         |
| DMF             | $4.96 \times 10^7$ | $2.40 \times 10^6$ | 4.83%          |

**Table S3.** Mean value and standard deviation of the lactate signal at 1.3 ppm.

| Solvent      | Mean               | Standard Deviation | Deviation in % |
|--------------|--------------------|--------------------|----------------|
| Water        | $4.31 \times 10^6$ | $5.18 \times 10^4$ | 1.20%          |
| Methanol     | $4.15 \times 10^6$ | $2.51 \times 10^4$ | 0.60%          |
| Acetonitrile | $4.36 \times 10^5$ | $5.24 \times 10^4$ | 12.01%         |
| DMSO         | $1.96 \times 10^6$ | $1.38 \times 10^5$ | 7.03%          |
| Acetone      | $3.89 \times 10^5$ | $1.68 \times 10^5$ | 43.27%         |
| DMF          | $1.66 \times 10^6$ | $1.78 \times 10^5$ | 10.74%         |

**Table S4.** Mean value and standard deviation of the histidine signal around 8.2 ppm.

| Solvent  | Mean               | Standard Deviation | Deviation in % |
|----------|--------------------|--------------------|----------------|
| Water    | $3.80 \times 10^6$ | $6.44 \times 10^4$ | 1.70%          |
| Methanol | $6.24 \times 10^6$ | $4.37 \times 10^5$ | 7.01%          |
| DMSO     | $5.27 \times 10^6$ | $3.85 \times 10^5$ | 7.30%          |
| DMF      | $7.43 \times 10^5$ | $5.51 \times 10^5$ | 74.12%         |

**Table S5.** Mean value and standard deviation of the alanine signal at 1.5 ppm.

| Solvent  | Mean               | Standard Deviation | Deviation in % |
|----------|--------------------|--------------------|----------------|
| Water    | $7.42 \times 10^6$ | $1.00 \times 10^5$ | 1.35%          |
| Methanol | $7.50 \times 10^6$ | $1.49 \times 10^5$ | 1.99%          |
| DMSO     | $4.82 \times 10^6$ | $3.20 \times 10^5$ | 6.64%          |
| DMF      | $4.35 \times 10^6$ | $4.08 \times 10^5$ | 9.37%          |

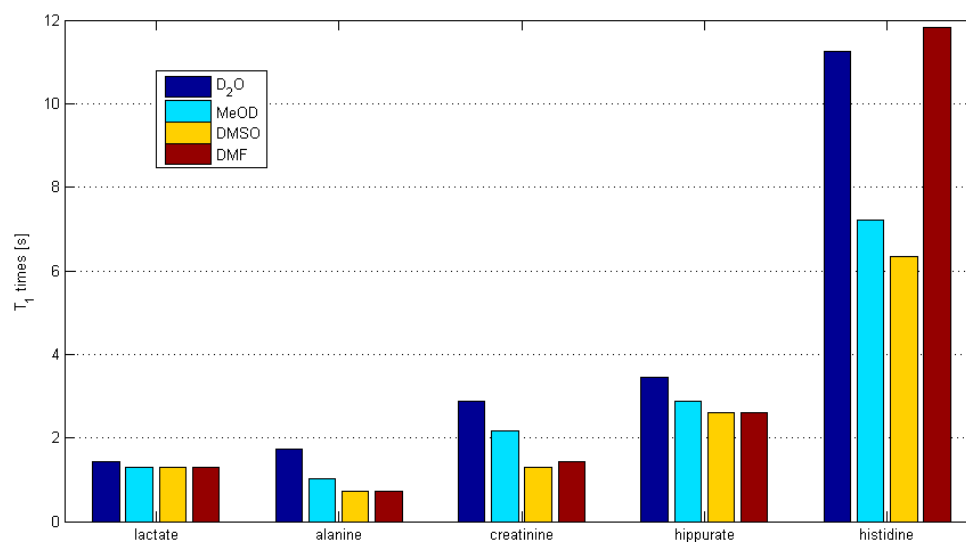

**Figure S1.** T<sub>1</sub> relaxation times of selected metabolites and solvents. The T<sub>1</sub> times in D<sub>2</sub>O are larger than 2 s for most of the metabolites. In MeOD, DMSO, and DMF relaxations times are significantly shorter with the exception of histidine in DMF.
